# Supplementary material for: Co-expression of HIF-1α, MDR1 and LAPTM4B in peripheral blood of solid tumors
Source: PeerJ. 2019 Feb 7;7:e6309. doi: 10.7717/peerj.6309 (PMC6368972; doi:10.7717/peerj.6309)
Supplement: Supplemental Information 1 [file peerj-07-6309-s001.xlsx]

## Sheet: Breast Cancer
HIF-1										MDR1									LAPTM4B
S. No	Non-Metastasis	Metastasis		I-II	III-IV		Treatment Naive	On Treatment		Non-Metastasis	Metastasis		I-II	III-IV		Treatment Naive	On Treatment		Non-Metastasis	Metastasis		I-II	III-IV		Treatment Naive	On Treatment
1	0.528308	3.1864		0.528308	3.1864		3.24059	3.1864		1.37119	2.53618		2.53618	3.73879		3.01482	3.77943		1.95971	1.86488		1.95971	4.45825		1.65265	4.45825
2	-1.11682	2.77249		1.24476	2.77249		4.19184	2.97568		1.53826	3.26919		2.36865	3.58978		2.92902	3.69438		1.97468	1.24476		3.07051	3.09308		2.71379	4.67801
3	1.24476	3.24059		0.69839	3.24059		2.03496	2.77249		1.69329	3.77642		1.69329	1.53525		2.57531	1.99131		0.635173	1.65265		2.90645	1.65265		3.51452	3.09308
4	0.69839	3.18144		0.543359	3.18144		3.23005	4.97603		1.86187	2.99826		1.06715	1.12435		2.83269	4.80293		0.80676	1.98125		2.30137	1.98106		2.30137	3.78094
5	0.543359	2.24719		1.2553	2.24719		2.19451	2.1531		1.06715	2.37663		1.76103	1.22068		2.98622	3.72224		1.33657	1.69329		3.0404	3.68762		4.02628	4.59823
6	1.2553	3.30832		1.00544	3.30832		3.98263	3.13372		1.76103	3.41368		3.01482	1.86187		1.68276	3.77642		1.40129	1.56084		3.25865	2.41426		4.17679	5.75125
7	1.00544	3.99316		2.03496	3.99316		2.46092	2.24719		3.01482	2.7469		3.26919	1.06715		1.37119	4.11357		1.52622	1.65265		3.51452	2.59187		2.6596	3.68762
8	2.03496	3.9736		-0.130948	3.9736		1.65115	4.11057		2.36865	3.19092		1.86187	1.76103		1.53826	3.73879		2.13129	1.97468		2.20357	2.78001		1.95971	3.07051
9	-0.130948	3.2451		0.54938	3.2451		0.236309	4.41159		2.92902	3.06599		1.37119	2.28482		1.06715	3.51754		2.90645	1.98106		0.635173	2.6009		2.69271	2.90645
10	0.54938	2.96665		0.936203	2.96665		0.936203	2.485		2.57531	3.5943		2.37663	2.29836		1.25078	3.58978		2.30137	0.90676		0.80676	2.09065		1.86488	2.63702
11	0.936203	2.20053		0.195669	2.20053		0.528308	3.99316		3.13974	3.34143		1.99131	1.68276		1.76103	2.37663		3.0404	3.25865		1.33657	2.45791		2.13882	2.94859
12	0.195669	2.1531		3.69063	2.1531		0.54938	3.9736		2.89139	2.46092		1.53826	3.70417		1.53525	3.41368		2.45791	3.61085		1.40129	2.18698		2.05152	2.59187
13	2.29385	3.67106		2.34803	3.67106		-0.290494	3.2451		2.43684	2.74088		2.43684	3.77943		1.12435	2.7469		2.59187	3.40013		1.52622	3.40013		2.76345	2.78001
14	2.19451	2.97568		2.77249	2.97568		1.00544	2.99073		2.57531	3.80953		1.37119	2.79958		1.21014	3.23457		2.20357	3.51452		1.69329	2.60842		1.97468	2.6009
15	2.51059	3.13372		3.56871	3.13372		0.69839	3.11415		2.47296	3.72224		1.53826	2.83269		1.86187	3.26919		2.60842	3.86071		2.94859	5.75125		0.80676	3.25865
16	3.21199	2.485		2.79055	2.485			3.38207		2.28482	3.69438		1.69329	3.60483			4.28366		2.34502	5.75125		2.34502	4.55609			2.20357
17	2.79055	2.99073			2.99073			2.29385		2.79958	4.11357			3.77642			3.77943		2.22311	4.55609			4.56663			4.21743
18	3.69063	3.11415			3.11415			2.51059		2.83269	3.73879			2.99826			3.70417		2.94859	4.56663			4.67801			4.55609
19	2.34803	3.38207			3.38207			4.59372		2.57682	3.58978			3.45884			3.63042		3.07051	4.67801			4.21743			4.56663
20	2.77249	3.2451			3.2451			3.21199		2.29836	3.45884			3.41368			3.5943		2.18698	4.21743			1.97468			3.35799
21	3.56871	3.98263			3.98263			4.24452		2.59036	3.23457			2.7469			2.89139		2.78001	4.45825			4.02628			3.07051
22		3.86221			3.86221			4.9			4.28366			3.19092			3.13974			3.09308			4.17679			3.61085
23		3.75685			3.75685			3.5			3.70417			3.06599			3.19092			4.02628			3.07051			3.86071
24		4.00069			4.00069			2.66411			3.77943			2.46092			2.47296			4.17679			3.61085			2.09065
25		4.11057			4.11057			3.72073			3.32939			3.34143			3.80953			2.69271			3.86071			2.58284
26		1.96874			1.96874			2.27579			3.63042			3.79749			3.06599			2.46243			2.69271			1.24476
27		1.52923			1.52923			3.75685			4.11357			2.74088			3.34143			2.58284			2.46243			1.52622
28		0.236309			0.236309			3.63343			3.60483			3.80953			3.32939			3.07051			2.58284			2.45791
29		1.65115			1.65115			2.96665			2.1042			2.59036			2.57381			2.44737			2.13129			3.40013
30		3.23005			3.23005			4.97603			2.57381			2.98622			2.59036			2.40975			2.44737			2.40372
31		2.08012			2.08012			3.24059			2.98622			3.32939			2.1042			2.4248			2.40975			2.4549
32		3.72073			3.72073			1.52923			1.99131			3.63042			2.36865			2.76345			2.4248			1.86488
33		2.27579			2.27579			1.2553			1.3742			2.92902			3.79749			3.35799			2.76345			2.83871
34		3.63343			3.63343			1.24476			1.21014			2.57531			2.57682			3.68762			2.22311			1.24476
35		-0.290494			-0.290494			1.96874			1.73544			3.5943			2.79958			2.83871			1.86488			1.56084
36		3.04492			3.04492			1.52923			1.25078			2.89139			3.60483			2.40372			2.83871			2.40372
37		1.71888			1.71888			0.236309			1.53525			3.13864			2.74088			2.4549			1.24476			2.4549
38		3.56419			3.56419			1.71888			1.12435			4.28366			2.29836			2.13882			1.56084			2.13882
39		2.46092			2.46092			0.528308			1.22068			4.80293			4.41611			2.05152			2.40372			2.05152
40		2.66411			2.66411			1.52923			1.68276			4.28366			4.11357			2.41426			2.4549			0.90676
41		1.52923			1.52923			2.08012			1.46187			4.39654			4.39654			2.6009			2.13882			1.98125
42		2.19451			2.19451			1.96874			1.56715			4.11357			1.98131			2.09065			2.05152			1.65265
43		0.528308			0.528308			0.236309			1.76103			3.60483			1.3742			2.90645			0.90676			2.90645
44		2.08012			2.08012			3.2451			2.92902			3.5943			1.73544			2.71379			1.98125			2.71379
45		3.72073			3.72073			2.96665			3.5943			3.72224			1.46187			2.63702			1.65265			2.59187
46		2.27579			2.27579			2.20053			2.89139			3.73879			1.56715			2.30137			2.90645			2.78001
47		3.75685			3.75685			2.1531			3.13974			3.80953			1.69329			2.41426			2.71379			2.6009
48		3.63343			3.63343			3.67106			4.11357			3.51754			1.53826			2.59187			2.59187			3.0404
49		2.96665			2.96665			2.97568			3.7976			3.58978			3.72224			2.78001			2.78001			3.25865
50		4.97603			4.97603			3.13372			3.19092			3.41368			2.47296			2.6009			2.6009			3.61085
51		3.24059			3.24059			2.485			3.79749			2.74789			3.23457			3.0404			3.0404			3.51452
52					-1.11682			2.99073						3.45884			2.89139						3.25865			2.7469
53					2.29385			3.11415						3.72336			3.5943						3.61085			2.74789
54					2.19451			3.38207						3.69438			3.34143						3.51452			3.72336
55					2.51059			3.2451						3.23457			3.7976						2.7469			2.45791
56					3.21199			3.98263						2.47296			2.92902						2.74789			2.18698
57								-0.130948						2.57381			3.13864						3.72336			3.40013

## Sheet: Prostate Cancer
HIF-1										MDR1									LAPTM4B
S. No	Non-Metastasis	Metastasis		I-II	III-IV		Treatment Naive	On Treatment			Non-Metastasis	Metastasis		I-II	III-IV		Treatment Naive	On Treatment		Non-Metastasis	Metastasis		I-II	III-IV		Treatment Naive	On Treatment
1	1.65115	3.4994		1.73694	5.0257		1.73694	5.0257			1.22068	1.76103		1.22068	1.86187		2.57381	1.86187		2.40222	4.22044		2.40222	4.22044		2.40222	4.22044
2	1.57138	3.00729		1.22068	3.42271		1.22068	3.42271			1.12435	1.06715		3.13372	3.06599		1.22068	1.53525		2.4248	3.13071		1.1981	3.13071		3.32337	3.13071
3	1.89498	3.5657		2.50005	3.09308		2.2517	3.09308			2.0412	1.68276		2.0412	1.53525		1.12435	1.25078		2.44737	2.38115		1.40129	3.32337		3.86071	2.38115
4	2.45791	2.03364		1.65115	5.19728		1.65115	5.19728			3.16324	1.86187		1.76103	2.57381		2.31334	2.43684		2.31944	2.32535		2.76345	2.31944		2.32535	2.31944
5	2.50005	2.87785		1.57138	2.2517		1.57138	2.50005			2.31334	1.53525		3.1277	1.25078		2.29836	3.67106		1.1981	1.69329		1.86488	1.69329		1.40129	1.1981
6	2.2517	2.55876		1.89498	2.84925		3.5657	2.84925			2.57381	1.25078		2.53016	2.31334		1.06715	2.0412		1.40129	3.32337		2.38115	3.40013		2.76345	1.69329
7	2.84925	2.08012			3.4994		2.55876	1.89498			3.06599	4.90378			2.43684		1.68276	1.76103		2.76345	3.40013			2.08698		2.45791	1.86488
8	1.22068	5.19728			3.00729			3.4994			2.43684	3.13372			4.90378			3.1277		1.86488	2.08698			2.4248			3.40013
9		3.09308			2.45791			3.00729				3.1277			3.67106			2.53016			2.45791			2.45791			2.08698
10		3.42271			3.5657			2.45791				2.53016			1.68276			2.44737			3.07051			3.07051			2.4248
11		5.0257			2.03364			2.03364				2.44737			1.12435			4.16324			1.52622			1.52622			3.07051
12		1.96874			2.87785			2.87785				2.29836			2.44737			3.06599			3.61085			3.61085			1.52622
13		1.73694			2.55876			1.96874				3.67106			2.29836			4.90378			3.86071			3.86071			3.61085
14					2.08012			2.08012							4.16324			3.13372						2.44737			2.44737
15					1.96874										1.06715

## Sheet: Ovarian Cancer 
HIF-1										MDR1									LAPTM4B
S. No	Non-Mtastasis	Metastasis		I-II	III-IV		Treatment Naive	On Treatment		Non-Metastasis	Metastasis		I-II	III-IV		Treatment Naive	On Treatment		Non-Metastasis	Metastasis		I-II	III-IV		Treatment Naive	On Treatment
1	0.273937	2.08012		0.273937	2.08012		0.273937	2.08012		1.25078	3.79298		1.25078	3.79298		1.25078	3.79298		2.34653	3.5943		2.34653	3.5943		3.5943	4.56663
2	2.23364	3.97209		2.23364	3.97209		2.23364	3.97209		2.41276	3.25263		2.41276	3.25263		2.41276	3.25263		2.98471	4.45976		2.98471	4.45976		3.89382	4.45976
3	3.42271	0.195669		3.42271	0.195669		1.57138	0.195669		1.86338	2.03045		2.03045	2.03045		3.3038	2.03045		1.29142	2.05413		1.79414	2.05413		1.29142	2.05413
4	1.57138	3.98263		1.57138	3.98263		2.25923	3.98263		2.57381	2.57531		1.86338	2.57531		1.12435	2.57531		2.5136	4.17679		1.29142	4.17679		1.92057	4.17679
5	2.25923	2.90945		2.25923	2.90945		1.2553	2.90945		1.73995	2.84172		2.29836	2.84172		1.78995	2.84172		1.92057	4.45524		2.5136	4.45524		1.86488	4.45524
6	2.2517	3.69063		2.2517	0.936203		2.45791	1.65115		2.64304	1.53525		1.73995	1.53525		1.73995	1.53525		2.14785	4.55609		1.92057	4.55609		1.71286	2.34653
7	1.2553	3.5657		1.2553	3.69063		1.52923	3.69063		3.06298	1.79263		2.57381	1.79263		2.03045	1.79263		1.86488	2.48049		1.86488	2.48049		1.95971	4.55609
8	2.45791	3.74632		2.45791	3.5657		0.936203	3.5657		1.76103	1.86338		1.76103	1.86338		1.76103	1.86338		1.71286	3.89382		1.71286	3.89382		1.33657	2.98471
9	1.52923	2.84925		1.52923	3.74632			3.74632		2.59036	3.74782		3.3038	3.74782			3.74782		1.95971	3.32939		1.95971	3.32939			2.48049
10	0.936203	2.20203		3.40314	2.84925			2.84925		1.12435	2.03045		1.12435	2.64304			2.64304		2.40013	1.79414		2.40013	2.14785			3.32939
11	3.40314	3.86974		2.23364	2.20203			2.20203		1.78995	1.22068		1.78995	1.22068			1.22068		2.40975	2.50758		2.40975	2.50758			1.79414
12	1.65115	2.87785		2.55876	3.86974			3.86974		2.29836	3.215		2.28482	3.215			3.215		2.58284	2.40523		2.58284	2.40523			2.5136
13	2.23364	1.96874			2.87785			2.87785		2.43684	1.86187			1.86187			1.86187		2.92601	2.47146			2.47146			2.14785
14	2.55876	1.71888			1.96874			1.96874		2.46092	3.05997			3.05997			3.05997		2.4248	3.61085			3.61085			2.50758
15		3.56871			1.71888			1.71888			1.06715			1.06715			1.06715			1.33657			1.33657			2.40523
16		2.88989			1.65115			3.40314			1.68276			1.68276			1.68276			1.86488			1.86488			2.47146
17		3.86221			3.56871			3.56871			4.0624			4.0624			4.0624			1.52622			1.52622			3.61085
18		2.27579			2.88989			2.88989			3.26467			3.26467			3.26467			1.46243			2.46243			1.86488
19		2.77249			3.86221			3.86221			3.3038			2.59036			2.59036			3.09065			3.09065			1.52622
20		4.00069			2.27579			2.27579			2.98622			2.98622			2.98622			3.09065			3.09065			2.40013
21		3.67106			2.77249			2.77249			3.03739			3.06298			3.06298			4.17679			2.4248			2.40975
22		3.56419			4.00069			4.00069			3.34143			2.43684			2.43684			3.78094			3.78094			2.46243
23		2.46092			3.67106			3.67106			3.60483			3.60483			3.60483			4.56663			4.56663			2.58284
24		2.66411			3.56419			3.56419			2.74088			2.74088			2.74088			3.35799			3.35799			3.09065
25		2.55876			2.46092			2.46092			2.28482			3.03739			3.03739			4.02628			4.02628			2.09486
26		3.5657			2.66411			2.66411			2.79958			2.79958			2.79958			4.59823			4.59823			2.4248
27		3.74632			2.55876			2.55876			3.06599			3.06599			3.06599			2.09486			2.92601			3.78094
28		1.89498			3.5657			3.5657			2.83269			2.83269			2.83269			1.64737			4.17679			3.35799
29					3.74632			3.74632						3.34143			3.34143						2.09486			4.02628
30					1.89498			1.89498						2.46092			2.46092						1.64737			4.59823
								3.42271									1.86338									2.92601
								2.55876									2.57381									4.17679

## Sheet: Colon Cancer
HIF-1										MDR1									LAPTM4B
S. No	Non-Metastasis	Metastasis		I-II	III-IV		Treatment Naive	On Treatment		Non-Metastasis	Metastasis		I-II	III-IV		Treatment Naive	On Treatment		Non-Metastasis	Metastasis		I-II	III-IV		Treatment Naive	On Treatment
1	1.245	1.255		1.245	1.255		1.245	1.255		1.77758	2.03805		1.77758	2.03805		1.77758	2.03805		2.028			2.028	1.946		2.028	2.035
2	0.698	2.88236		0.698	3.09459		0.698	2.88236		1.60901	1.617		1.60901	2.038		1.60901	1.73544		2.066			2.066	4.46		2.066	2.768
3	0.562926	3.09459		2.88236	3.993		0.562926	3.09459		1.06715	1.991		1.86187	1.617		1.06715	1.617		1.43	2.035		2.768	2.035		1.43	1.946
4	1.485	3.993		0.562926	3.114		1.52923	3.993		1.86187	2.1042		1.12435	1.991		1.86187	1.53525		2.093	2.768		1.801	1.758		1.758	4.46
5	1.991	1.52923		1.52923	2.57682		1.991	3.114		1.12435	1.95078		1.68276	2.1042		1.12435	1.76103		2.66	1.946		1.43	4.217		2.514	4.678
6	1.005	0.543		1.485	2.035		1.005	1.485		1.68276	1.53525		1.73544	1.53525		1.68276	3.51754		1.275	4.46		2.923	1.653		1.275	2.093
7	3.114	2.57682		1.991	2.294		0.543	2.57682		1.73544	1.76103		1.06715	1.76103		1.991	3.58978		1.981	1.653		2.094	2.088		1.981	4.217
8	2.294	2.035		1.005	2.04719		2.28783	2.035		2.57381	3.34143		2.61746	1.95078		2.1042	3.34143		2.306	2.923		2.093	3.94		2.094	1.653
9	2.28783	1.24476		0.543	2.28783		2.28783	2.294		2.61746	2.61746		2.98622	3.34143		1.95078	2.61746		2.094	1.758		2.306	3.559		3.592	2.088
10	3.23	2.04719		1.24476	2.58585		3.09459	2.04719		2.99826	4.19786		2.57381	4.19786		2.99826	4.19786		1.801	4.217		2.66	2.071		3.78	3.94
11	2.57682	2.28783		2.28783	2.87064		2.26525	4.09459		3.51754	3.69438		2.61746	3.69438		2.61746	3.69438		1.02	2.088		1.02	2.514		2.306	3.559
12		2.58585		3.23	3.382		4.28783	2.58585			2.98622		2.99826	2.75442		4.19786	2.75442			3.94		1.275	1.937		1.02	2.071
13		2.87064		2.57682	4.09459		3.23	1.24476			2.75442		3.51754	3.60483		2.98622	2.57381			3.559		1.981	4.678		1.801	4.301
14		3.382			3.09459			2.87064			3.60483			4.80293			3.60483			2.071			3.592			1.937
15		4.09459			2.26525			3.382			4.80293			3.32638			4.80293			2.514			3.78			1.915
16		3.09459			4.28783			2.88236			3.32638			3.26467			3.32638			1.937			4.301			4.751
17		2.26525			2.88236			2.58585			3.26467			3.72224			3.26467			3.592			4.751			2.66
18		4.28783			2.58585			2.57682			3.72224			4.19786			3.72224			3.78			1.915			2.923
19		2.88236			3.77191			3.77191			4.19786			3.58978			2.81722			4.301			4.366			4.366
20		2.58585									3.58978									4.751
21		3.77191									2.81722									4.678
22
23

## Sheet: Controls
S.No	HIF-1 Control		MDR1 Control		LAPTM4B Control
1	0.056879		-0.200185		-0.665276
2	-0.841379		3.10663		0.436493
3	0.407896		0.562926		2.07711
4	1.48408		0.350158		-0.260391
5	0.54351		0.504225		-0.0757994
6	1.53525		1.64061		-0.523792
7	2.40523		1.52923		2.32847
8	0.492184		2.11173		1.17402
9	1.59847		3.07653		2.76345
10	-0.638184		0.462081		2.8944
11	-1.51268		1.15596		-0.538844
12	-1.73393		1.15897		0.0496699
13	-0.553895		1.44795		0.391339
14	-1.51719		1.20864		0.170082
15	1.3456		0.773647		0.209216
16	0.117402		1.55331		0.0963298
17	0.391339		1.03705		0.844389
18	-2.58886		0.901585		-0.227278
19	-1.8423		0.638184		-0.437999
20	-0.835358		1.62105		-0.264906
21	0.29802		1.76554		0.270927
22	0.308556		1.42538		0.860946
23	0.462081		2.46995		-0.65173
24	-0.909111		1.14993		0.0782679
25	-0.540349		1.16047		-0.454555
26	0.427463		1.65717		-0.59905
27	-0.412411		1.03404		0.0346184
28	0.174597		0.249855		-0.570452
29	0.40639		1.30045		-1.06565
30	1.04307		1.24626		-0.4967
31	0.845894		1.44344		-0.370267
32	-0.0587008		2.40975		-0.111381
33	-1.16047		2.59789		0.434988
34	-0.841379		2.19752		0.313071
35	0.543359		2.01239		2.72282
36	1.42538		2.13581		0.621627
37	1.08973		1.03554		0.282968
38	0.35672		2.37362		-0.146
39	0.981358		1.71437		3.29477
40	-0.459071		1.93261		0.127938
41	0.537339		1.67222		0.0888039
42	-1.57138		1.62857		-0.475627
43	1.63309		1.92358		-0.153525
44	1.63459		-1.00695		0.313071
45	3.11566		1.97777		0.710431
46	-0.104774		0.412411		0.912121
47	-1.54278		1.33778		-0.760101
48	-1.44344		0.6871		0.5767
49	2.34502		0.897884		0.271937
50	-1.34388		1.3204		0.0867039
51	1.02367		1.42		0.346184
52	0.494292		2.05138		0.620431
53	0.951077		1.16722		0.392968
54	1.0145		0.938094		-0.545555
55	-0.273634		1.75319		-0.995005
56	-0.29637		0.89051		-0.486999
57	0.34748		0.972322		-0.295906
58	0.446185		1.34694		0.434988
59	0.388481		1.78751		0.131071
60	0.494291		2.28286		-0.288517
61	1.63036		0.515031		0.464934
62	-0.836668		1.0911		0.292868
63	0.0691082		1.13485		0.0965677
64	-0.833746		0.0740177		0.161627
65	0.510769		0.821132		0.169916
66	0.0286563		0.143788		1.72282
67	0.0360214		0.282516		0.354868
68	-0.895916		2.02623		0.194244
69	-0.763501		1.50104		-0.733993
70	-0.873572		0.2932		-0.412611
71	0.248635		0.418311		0.517824
72	-0.144086		2.86845		0.577117
73	1.49485		0.934989		0.0690966
74	2.54912		1.02947		0.705938
75	0.073812		2.14423		-0.460356
76	0.0413393		1.83436		0.562479
77	0.546385		1.06333		0.357202
78	0.933499		1.01261		-0.557154
79	1.42538		2.25802		0.292868
80	-0.93457		1.83471		0.0888039
